# Supplementary material for: The first magnetic observatory of Honduras: Assessment and magnetic prospecting in 2019–2025
Source: Copernicus journal article supplement (doi:10.5194/egusphere-2025-2319), 2025-10-13
Supplement: Supplementary file [file egusphere-2025-2319-RC2-supplement.pdf]

The manuscript primarily recounts the extensive work the team conducted in Honduras for electromagnetic detection. It reads more like an engineering report than a research paper.

Regarding the content, the following questions and suggestions are raised:

1. The article mentions the team's geomagnetic detection work in Honduras. The obtained geomagnetic data should be analyzed in depth to reveal substantial advantages and compare it with other sites, rather than providing superficial analysis or simply using others' data for explanation.
2. The article devotes considerable space to describing the difficulties and challenges of the work; it is recommended to reduce this section appropriately.
3. What is the magnitude and three components of the geomagnetic intensity at the selected location?
4. The key specifications of the equipment selected during the survey should be listed.
5. If a geomagnetic observatory were to be built at the selected location, what are the plans and arrangements, and what equipment will be deployed?
